# Supplementary material for: High-precision measurement of Fe isotopes by double spike CRC (collision/reaction cell)-MC-ICP-MS at the nanogram level
Source: Royal Society of Chemistry journal article supplement (doi:10.1039/d5ja00467e), 2025-12-11
Supplement: d5ja00467e1.xlsx [file d5ja00467e1.xlsx]

## Sheet: Table1
type	δ56/54 Fe	average δ56/54 Fe	2SD
ATD	0.0892567	0.0929388	0.0196175
	0.0785114
	0.0906137
	0.104182
	0.0860796
	0.0960706
	0.105858
BCR-2	0.112437	0.0843515	0.0325852
	0.084787
	0.0738435
	0.0750834
	0.0756062
BCR-414	-0.0922901	-0.1015	0.0245352
	-0.109856
	-0.0832156
	-0.100539
	-0.106044
	-0.117054
BHVO-2	0.100221	0.106505	0.0207433
	0.103967
	0.0998376
	0.0960389
	0.116628
	0.103986
	0.124854
BIR-1	0.0521205	0.061466	0.0177547
	0.074837
	0.0613277
	0.0543069
	0.0690723
	0.0571314
GSP-2	0.144255	0.152848	0.023425
	0.148387
	0.155648
	0.172474
	0.139351
	0.156973
NOD-P-1	-0.557597	-0.553281	0.0167507
	-0.56742
	-0.549334
	-0.557471
	-0.546457
	-0.542238
	-0.552452
PACS-3	0.125022	0.125696	0.0194312
	0.109693
	0.123196
	0.121853
	0.141884
	0.130417
	0.127807

## Sheet: Table2
Standard name	Standard Type	Reference	Instrument	Method	average δ56/54 Fe	2SD
ATD	Dust	This study	Sapphire	Double spike	0.0929388	0.0196175
		Mead et al. (2013)	Thermo Scientific Neptune	SSB	0.09	0.04
		Li et al. (2022)	Thermo Scientific Neptune	SSB+Cu doping	0.04	0.1
BCR-2	Basalt	This study	Sapphire	Double spike	0.0843515	0.0325852
		Wang et al. (2022)	Sapphire	SSB	0.0978669	0.0315782
		Dauphas and Rouxel (2006)	IsoProbe	SSB(cc)	0.054	0.077
		Weyer et al. (2005)	Thermo Scientific Neptune	SSB	0.079	0.043
		Dauphas et al. (2009)	Thermo Scientific Neptune	SSB	0.091	0.025
		Craddock and Dauphas (2011)	Thermo Scientific Neptune	SSB	0.091	0.0315
		Liu et al. (2014)	Thermo Fisher Neptune plus	SSB	0.107	0.025
		He et al. (2015)	Thermo Fisher Neptune plus	SSB	0.08	0.024
		He et al. (2015)	Thermo Fisher Neptune plus	SSB	0.084	0.029
		Zhu et al. (2018)	Thermo Fisher Neptune plus	SSB	0.088	0.019
		Chen et al. (2022)	Thermo Fisher Neptune plus	SSB	0.09	0.03
		Dideriksen et al. (2006)	Thermo elemental AXIOM	Double spike	0.03	0.06
		Millet et al. (2012)	Nu Plasma	Double spike	0.098	0.025
		Zhu et al. (2018)	Thermo Fisher Neptune plus	Double spike	0.081	0.041
		Oeser et al. (2014)	Thermo Scientific Neptune	Cu doping	0.091	0.037
		Oeser et al. (2014)	Thermo Scientific Neptune	Ni doping	0.085	0.031
		Chen et al. (2017)	Nu Plasma 1700	Ni doping	0.09	0.021
		Yang et al. (2025)	Sapphire	SSB	0.0967413	0.0255714
BCR-414	Plankton	This study	Sapphire	Double spike	-0.1015	0.0245352
		Hasegawa et al. (2022)	Thermo Scientific Neptune	Cu-doping	-0.09	0.07
BHVO-2	Basalt	This study	Sapphire	Double spike	0.106505	0.0207433
		Wang et al. (2022)	Sapphire	SSB	0.135851	0.00710737
		Chen et al. (2022)	Thermo Fisher Neptune plus	SSB	0.1	0.05
		Craddock and Dauphas (2011)	Thermo Scientific Neptune	SSB	0.114	0.04125
		Liu et al. (2014)	Thermo Fisher Neptune plus	SSB	0.121	0.049
		He et al. (2015)	Thermo Fisher Neptune plus	SSB	0.112	0.021
		He et al. (2015)	Thermo Fisher Neptune plus	SSB	0.109	0.028
		Zhu et al. (2018)	Thermo Fisher Neptune plus	SSB	0.115	0.031
		Zhu et al. (2018)	Thermo Fisher Neptune plus	Double spike	0.122	0.039
		Millet et al. (2012)	Nu Plasma	Double spike	0.128	0.019
		Dideriksen et al. (2006)	Thermoelemental AXIOM	Double spike	-0.03	0.046
		Oeser et al. (2014)	Thermo Scientific Neptune	Cu doping	0.1	0.043
		Oeser et al. (2014)	Thermo Scientific Neptune	Ni doping	0.099	0.036
		Chen et al. (2017)	Nu Plasma 1700	Ni doping	0.102	0.026
		Zhu et al. (2018)	Thermo Fisher Neptune plus	Ni doping	0.119	0.05
		Yang et al. (2025)	Sapphire	SSB	0.120091	0.0179605
BIR-1	Basalt	This study	Sapphire	Double spike	0.061466	0.0177547
		Wang et al. (2022)	Sapphire	SSB	0.0889335	0.0334523
		Weyer et al. (2005)	Thermo Scientific Neptune	SSB	0.055	0.036
		Oeser et al. (2014)	Thermo Scientific Neptune	Ni doping	0.048	0.032
		Oeser et al. (2014)	Thermo Scientific Neptune	Cu doping	0.051	0.038
		Liu et al. (2014)	Thermo Fisher Neptune plus	SSB	0.078	0.027
		Dideriksen et al. (2006)	Thermoelemental AXIOM	Double spike	0.12	0.06
		Millet et al. (2012)	Nu Plasma	Double spike	0.05	0.014
GSP-2	Granodiorite	This study	Sapphire	Double spike	0.152848	0.023425
		Wang et al. (2022)	Sapphire	SSB	0.170931	0.00772505
		Craddock and Dauphas (2011)	Thermo Scientific Neptune	SSB	0.159	0.0305
		Liu et al. (2014)	Thermo Fisher Neptune plus	SSB	0.173	0.031
		Liu et al. (2014)	Thermo Fisher Neptune plus	SSB	0.164	0.06
		He et al. (2015)	Thermo Fisher Neptune plus	SSB	0.154	0.012
		He et al. (2015)	Thermo Fisher Neptune plus	SSB	0.157	0.025
		Zhu et al. (2018)	Thermo Fisher Neptune plus	SSB	0.158	0.023
		Zhu et al. (2018)	Thermo Fisher Neptune plus	Double spike	0.154	0.06
		Zhu et al. (2018)	Thermo Fisher Neptune plus	Ni doping	0.149	0.03
		Chen et al. (2017)	Nu Plasma 1700	Ni doping	0.163	0.034
NOD-P-1	Manganese nodule	This study	Sapphire	Double spike	-0.553281	0.0167507
		Williams et al. (2014)	Thermo Scientific Neptune	SSB	-0.569	0.03
		Asael et al. (2013)	Thermo Scientific Neptune	SSB	-0.49	0.08
		Gagnevin et al. (2012)	Thermo Fisher Neptune plus	SSB	-0.67	0.02
PACS-3	Marine sediment	This study	Sapphire	Double spike	0.125696	0.0194312
